# Supplementary material for: Metallosupramolecular Ni2L3 and Ni4L6 complexes of bis-bidentate pyridine-containing ligands: X-ray structures and catalytic proton reduction
Source: Royal Society of Chemistry journal article supplement (doi:10.1039/c5dt01706h), 2015-01-01
Supplement: c5dt01706h1.pdf [file c5dt01706h1.pdf]

## Metallosupramolecular Ni<sub>2</sub>L<sub>3</sub> and Ni<sub>4</sub>L<sub>6</sub> complexes of bis-bidentate pyridine-containing ligands: X-ray structures and catalytic proton reduction

Chui-Shan Tsang, Lingjing Chen, Lu-Wei Li, Shek-Man Yiu, Tai-Chu Lau and Hoi-Lun Kwong\*

### Supporting Information

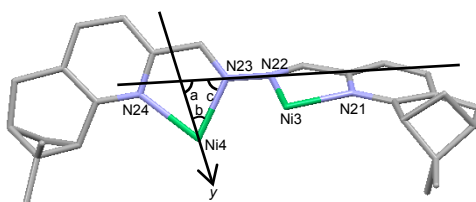

The coordination vector  $y$  is the resultant coordination vector of Ni4–N23 and Ni4–N24 and is assumed that it is passed through the mid-point of the distance of N23 and N24 bisecting the bite angle of N23–Ni4–N24.

The directional angle  $\angle a$  is defined by the resultant coordination vector  $y$  and the interannular N22–N23 bond between the bidentate pyridyl-imine binding domains.

$$\angle b = \angle(\text{N23-Ni4-N24}) / 2 = 77^\circ / 2 = 38.5^\circ$$

$$\angle c = 180^\circ - \angle(\text{Ni4-N23-N22}) = 180^\circ - 123^\circ = 57^\circ$$

$$\angle a = 180^\circ - \angle b - \angle c = 84.5^\circ$$

**Figure S1.** Graphical representation of directional angle of the bidentate pyridyl-imine binding domain of **L1** and its determination.

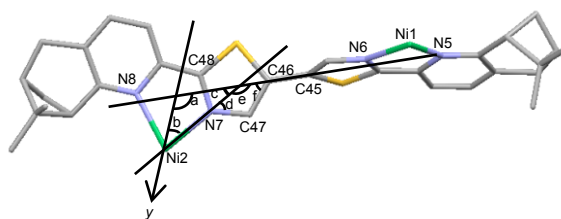

The coordination vector  $y$  is the resultant coordination vector of Ni2–N8 and Ni2–N7 and is assumed that it is passed through the mid-point of the distance of N8 and N7 bisecting the bite angle of N8–Ni2–N7.

The directional angle  $\angle a$  is defined by the resultant coordination vector  $y$  and the interannular C45–C46 bond between the bidentate pyridyl-thiazole binding domains.

$$\angle b = \angle(\text{N8-Ni2-N7}) / 2 = 79^\circ / 2 = 39.5^\circ$$

$$\angle d = 180^\circ - \angle(\text{Ni2-N7-C47}) = 180^\circ - 136^\circ = 44^\circ$$

$$\angle f = 180^\circ - \angle(\text{C47-C46-C45}) = 180^\circ - 129^\circ = 51^\circ$$

$$\angle e = 360^\circ - \angle d - \angle f - \angle(\text{N7-C47-C46}) = 360^\circ - 44^\circ - 51^\circ - 115^\circ = 150^\circ$$

$$\angle c = 180^\circ - \angle e = 30^\circ$$

$$\angle a = 180^\circ - \angle b - \angle c = 110.5^\circ$$

**Figure S2.** Graphical representation of directional angle of the bidentate pyridyl-thiazole binding domain of **L2** and its determination.

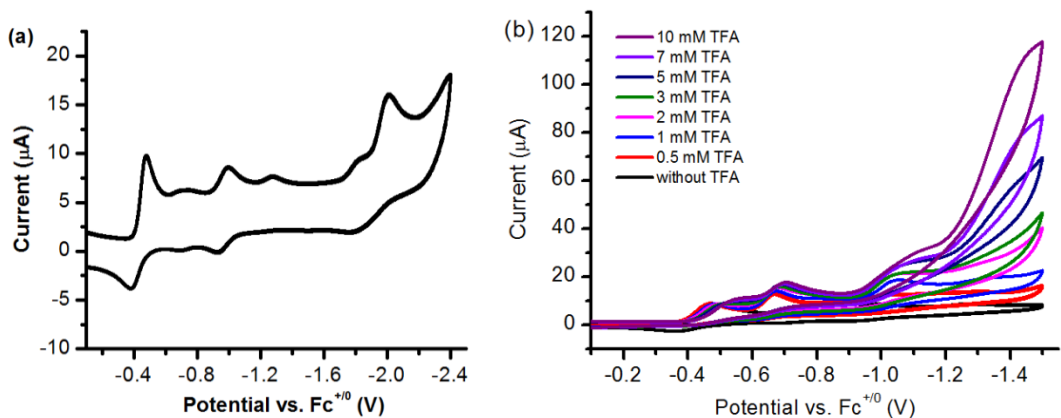

**Figure S3.** (a) Cyclic voltammogram of 0.25 mM of  $[\text{Ni}_2(\text{L1})_3](\text{ClO}_4)_4$ . (b) Cyclic voltammogram of 0.25 mM  $[\text{Ni}_2(\text{L1})_3](\text{ClO}_4)_4$  in the absence and presence of TFA.

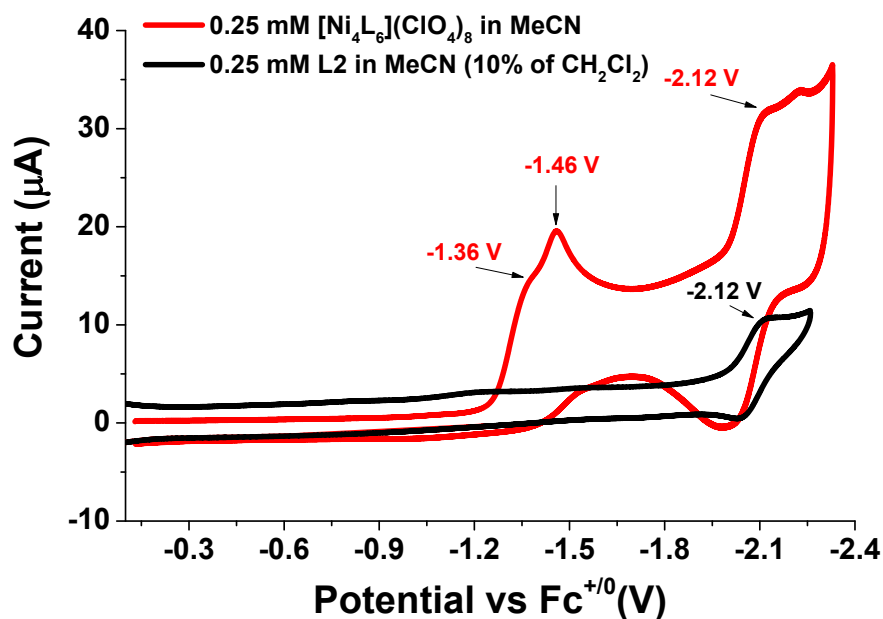

**Figure S4.** Cyclic voltammogram of 0.25 mM of  $[\text{Ni}_4(\text{L2})_6](\text{ClO}_4)_8$  in MeCN (red) and 0.25 mM of **L2** in the mixture of dichloromethane and MeCN (10% volume of  $\text{CH}_2\text{Cl}_2$  in MeCN) (black).

**Table S1.** Crystal data, data collection, and refinement parameters of  $[\text{Ni}_2(\text{L1})_3](\text{ClO}_4)_4$  and  $[\text{Ni}_4(\text{L2})_6](\text{ClO}_4)_8$  [a]

| Compound                                      | $[\text{Ni}_2(\text{L1})_3](\text{ClO}_4)_4$ | $[\text{Ni}_4(\text{L2})_6](\text{ClO}_4)_8$ |
|-----------------------------------------------|----------------------------------------------|----------------------------------------------|
| Formula                                       | Ni2 C87 H103.5 N16.5<br>Cl4 O16              | Ni4 C181.75 H183<br>Cl9.50 N24.50 O32 S12    |
| $M_r$                                         | 1895.58                                      | 4178.86                                      |
| Color, habit                                  | Yellow, oblique                              | Colorless, rectangular                       |
| Lattice type                                  | Triclinic                                    | Trigonal                                     |
| Space group                                   | P1                                           | P3                                           |
| $a$ [Å]                                       | 12.5581(5)                                   | 26.2992(4)                                   |
| $b$ [Å]                                       | 12.6724(4)                                   | 26.2992(4)                                   |
| $c$ [Å]                                       | 29.7591(9)                                   | 19.8472(5)                                   |
| $\alpha$ [°]                                  | 89.099 (2)                                   | 90.00                                        |
| $\beta$ [°]                                   | 81.233 (3)                                   | 90.00                                        |
| $\gamma$ [°]                                  | 76.182 (3)                                   | 120.00                                       |
| $V$ [Å <sup>3</sup> ]                         | 4544.0(3)                                    | 11888.2(4)                                   |
| $Z$                                           | 2                                            | 2                                            |
| $D_x$ [g m <sup>-3</sup> ]                    | 1.385                                        | 1.167                                        |
| $F_{000}$                                     | 1986                                         | 4333                                         |
| Radiation used                                | CuK $\alpha$                                 | CuK $\alpha$                                 |
| $\mu$ [mm <sup>-1</sup> ]                     | 2.204                                        | 2.833                                        |
| $\theta$ range [°]                            | 3.0032°–71.6697°                             | 3.3582°–71.53°                               |
| Unique reflections measured                   | 20270                                        | 15399                                        |
| Unique reflections observed, $I > 2\sigma(I)$ | 20982                                        | 18122                                        |
| $R$                                           | 0.0514                                       | 0.0553                                       |
| $wR^2$                                        | 0.1502                                       | 0.1527                                       |

[a] Details in common: graphite monochromatic radiation, 173 K, Oxford Diffraction CrystAlisPro, refinement based on  $F^2$ .

**Table S2.** Selected bond lengths and bond angles of  $[\text{Ni}_2(\text{L1})_3](\text{ClO}_4)_4$ 

| Bond length (Å) |           |              |          |
|-----------------|-----------|--------------|----------|
| Ni3–N13         | 2.213(4)  | Ni4–N15      | 2.092(4) |
| Ni3–N14         | 2.089(4)  | Ni4–N16      | 2.171(4) |
| Ni3–N19         | 2.092(3)  | Ni4–N17      | 2.191(4) |
| Ni3–N20         | 2.163 (4) | Ni4–N18      | 2.096(4) |
| Ni3–N21         | 2.192(3)  | Ni4–N23      | 2.103(4) |
| Ni3–N22         | 2.095(4)  | Ni4–N24      | 2.198(4) |
| Bond angles (°) |           |              |          |
| N13–Ni3–N19     | 91.5(2)   | N17–Ni4–N18  | 76.7(2)  |
| N19–Ni3–N20     | 76.9(2)   | N17–Ni4–N124 | 104.2(2) |
| N20–Ni3–N21     | 104.8(2)  | N16–Ni4–N24  | 105.7(2) |
| N21–Ni3–N22     | 76.1(2)   | N16–Ni4–N23  | 91.6(2)  |
| N14–Ni3–N22     | 86.2(2)   | N15–Ni4–N23  | 86.1(2)  |
| N14–Ni3–N19     | 86.0(2)   | N15–Ni4–N18  | 86.3(2)  |
| N13–Ni3–N14     | 76.6(2)   | N23–Ni4–N224 | 76.6(2)  |

**Table S3.** Selected bond lengths and bond angles of  $[\text{Ni}_4(\text{L2})_6](\text{ClO}_4)_8$ 

| Bond length (Å) |           |             |          |
|-----------------|-----------|-------------|----------|
| Ni1–N1          | 2.183(6)  | Ni2–N7      | 2.080(4) |
| Ni1–N2          | 2.067(6)  | Ni2–N8      | 2.196(5) |
| Ni1–N3          | 2.176(7)  | Ni2–N7a     | 2.080(4) |
| Ni1–N4          | 2.102 (5) | Ni2–N8a     | 2.196(5) |
| Ni1–N5          | 2.206(4)  | Ni2–N7b     | 2.080(4) |
| Ni1–N6          | 2.082(4)  | Ni2–N8b     | 2.196(5) |
| Bond angles (°) |           |             |          |
| N2–Ni1–N4       | 90.5(2)   | N8–Ni2–N7   | 78.7(2)  |
| N2–Ni1–N1       | 78.7(2)   | N7–Ni2–N7a  | 91.6(2)  |
| N1–Ni1–N5       | 104.9(2)  | N7a–Ni2–N8a | 78.7(2)  |
| N5–Ni1–N3       | 103.9(2)  | N8a–Ni2–N7b | 84.9(2)  |
| N3–Ni1–N6       | 84.3(2)   | N8a–Ni2–N8b | 103.9(2) |
| N6–Ni1–N4       | 91.5(2)   | N8b–Ni2–N7b | 78.7(2)  |
| N4–Ni1–N1       | 84.0(2)   | N8–Ni2–N8a  | 103.9(2) |
